# Supplementary material for: KLHL17/Actinfilin, a brain-specific gene associated with infantile spasms and autism, regulates dendritic spine enlargement
Source: PubMed Central journal article supplement (PMC7708131; doi:10.1186/s12929-020-00696-1), 2020-12-01
Supplement: 12929_2020_696_MOESM1_ESM.pdf [file 12929_2020_696_MOESM1_ESM.pdf]

| Figure  | Assay Performed                         | Parameter (Unit)                                                    | Groups                                                                            | N                                                                   | Descriptive Statistics<br>Average $\pm$ SEM | Statistical Analysis |                                                    |                                                                                                             |                        | Column statistics |                                                    |                                                    |                      |                      |         |        |
|---------|-----------------------------------------|---------------------------------------------------------------------|-----------------------------------------------------------------------------------|---------------------------------------------------------------------|---------------------------------------------|----------------------|----------------------------------------------------|-------------------------------------------------------------------------------------------------------------|------------------------|-------------------|----------------------------------------------------|----------------------------------------------------|----------------------|----------------------|---------|--------|
|         |                                         |                                                                     |                                                                                   |                                                                     |                                             | Statistical Test     |                                                    | Significance                                                                                                |                        | Factor            | Comparison                                         | P value                                            |                      |                      |         |        |
| 2       | b                                       | Knockdown efficiency of endogenous AF                               | Ctrl-miR                                                                          | 20                                                                  | 18.15 $\pm$ 2.404                           | Unpaired T test      | P value                                            | 0.0067                                                                                                      | t(38)=2.868            | Two-tail          | Multiple Comparison Procedures (Bonferroni t-test) | Ctrl-miR vs. AF-miR                                | 0.0033               |                      |         |        |
|         |                                         |                                                                     | AF-miR                                                                            | 20                                                                  | 10.33 $\pm$ 1.285                           |                      |                                                    |                                                                                                             |                        |                   |                                                    | Ctrl-miR vs. AF(res)                               | >0.9999              |                      |         |        |
|         |                                         | d                                                                   | Cultured neuron transfected with Ctrl-miR, AF-miR, AF(res)_DIV 6+6_Sholl analysis | No. of crossing intersection_40 $\mu$ m                             | Ctrl-miR                                    | 60                   | 13.55 $\pm$ 0.5149                                 | Genotype:: F(2,6661)=56.55, P<0.0001<br>interaction::F(39,6661)=286, P<0.0001<br>F(78,6661)=1.561, P=0.0012 | Crossing Interaction:: | One way ANOVA     |                                                    | Multiple Comparison Procedures (Bonferroni t-test) | Ctrl-miR vs. AF-miR  | <0.0001              |         |        |
|         |                                         |                                                                     |                                                                                   |                                                                     | AF-miR                                      | 60                   | 11.77 $\pm$ 0.4918                                 |                                                                                                             |                        |                   |                                                    |                                                    | Ctrl-miR vs. AF(res) | >0.9999              |         |        |
|         |                                         |                                                                     |                                                                                   | No. of crossing intersection_50 $\mu$ m                             | Ctrl-miR                                    | 60                   | 13.12 $\pm$ 0.5031                                 |                                                                                                             |                        |                   |                                                    |                                                    | Ctrl-miR vs. AF-miR  | <0.0001              |         |        |
|         |                                         |                                                                     |                                                                                   |                                                                     | AF-miR                                      | 60                   | 10.78 $\pm$ 0.4964                                 |                                                                                                             |                        |                   |                                                    |                                                    | Ctrl-miR vs. AF(res) | >0.9999              |         |        |
|         |                                         |                                                                     |                                                                                   | No. of crossing intersection_60 $\mu$ m                             | Ctrl-miR                                    | 60                   | 12.06 $\pm$ 0.5236                                 |                                                                                                             |                        |                   |                                                    |                                                    | Ctrl-miR vs. AF-miR  | 0.0049               |         |        |
|         |                                         |                                                                     |                                                                                   |                                                                     | AF-miR                                      | 60                   | 10.34 $\pm$ 0.4945                                 |                                                                                                             |                        |                   |                                                    |                                                    | Ctrl-miR vs. AF(res) | >0.9999              |         |        |
|         |                                         |                                                                     |                                                                                   | No. of crossing intersection_70 $\mu$ m                             | Ctrl-miR                                    | 60                   | 11.23 $\pm$ 0.5358                                 |                                                                                                             |                        |                   |                                                    |                                                    | Ctrl-miR vs. AF-miR  | 0.0033               |         |        |
|         |                                         |                                                                     |                                                                                   |                                                                     | AF-miR                                      | 60                   | 9.45 $\pm$ 0.4956                                  |                                                                                                             |                        |                   |                                                    |                                                    | Ctrl-miR vs. AF(res) | >0.9999              |         |        |
|         | No. of crossing intersection_80 $\mu$ m |                                                                     |                                                                                   | Ctrl-miR                                                            | 60                                          | 10.14 $\pm$ 0.4928   | Ctrl-miR vs. AF-miR                                |                                                                                                             |                        |                   | 0.0006                                             |                                                    |                      |                      |         |        |
|         |                                         |                                                                     |                                                                                   | AF-miR                                                              | 60                                          | 8.117 $\pm$ 0.4865   | Ctrl-miR vs. AF(res)                               |                                                                                                             |                        |                   | 0.7006                                             |                                                    |                      |                      |         |        |
|         | f                                       | No. of protrusions / 20 $\mu$ m                                     | Ctrl-miR                                                                          | 60                                                                  | 14.32 $\pm$ 0.5073                          | One way ANOVA        | Multiple Comparison Procedures (Bonferroni t-test) | Ctrl-miR vs. AF-miR                                                                                         | >0.999                 |                   |                                                    |                                                    |                      |                      |         |        |
|         |                                         |                                                                     | AF-miR                                                                            | 60                                                                  | 14.97 $\pm$ 0.612                           |                      |                                                    | Ctrl-miR vs. AF(res)                                                                                        | >0.999                 |                   |                                                    |                                                    |                      |                      |         |        |
|         |                                         |                                                                     | AF(res)                                                                           | 60                                                                  | 14.23 $\pm$ 0.557                           |                      |                                                    |                                                                                                             |                        |                   |                                                    |                                                    |                      |                      |         |        |
|         |                                         |                                                                     | g1                                                                                | Cultured neuron transfected with Ctrl-miR, AF-miR, AF(res)_DIV 12+6 | Cumulative (%) in spine width               |                      |                                                    | Ctrl-miR                                                                                                    | 858                    | Statistical Test  | KS-test                                            | P value                                            | D                    | Ctrl-miR vs. AF-miR  | <0.0001 | 0.3137 |
|         |                                         |                                                                     |                                                                                   |                                                                     |                                             |                      |                                                    | AF-miR                                                                                                      | 898                    |                   |                                                    |                                                    |                      | Ctrl-miR vs. AF(res) | 0.3     | 0.0468 |
|         |                                         |                                                                     |                                                                                   |                                                                     |                                             |                      |                                                    | AF(res)                                                                                                     | 854                    |                   |                                                    |                                                    |                      |                      |         |        |
|         |                                         |                                                                     | g2                                                                                | Cumulative (%) in spine length                                      | Ctrl-miR                                    |                      |                                                    | 858                                                                                                         | Statistical Test       | KS-test           | P value                                            | D                                                  | Ctrl-miR vs. AF-miR  | 0.124                | 0.0811  |        |
|         |                                         |                                                                     |                                                                                   |                                                                     | AF-miR                                      |                      |                                                    | 898                                                                                                         |                        |                   |                                                    |                                                    | Ctrl-miR vs. AF(res) | 0.525                | 0.0568  |        |
| AF(res) |                                         |                                                                     |                                                                                   |                                                                     | 854                                         |                      |                                                    |                                                                                                             |                        |                   |                                                    |                                                    |                      |                      |         |        |
| 3       |                                         |                                                                     | e1                                                                                | Percentage (%) of PSD95+ protrusion/D endrite                       | Ctrl-miR                                    |                      |                                                    | 20                                                                                                          | 75.25 $\pm$ 2.844      | One way ANOVA     | Multiple Comparison Procedures (Bonferroni t-test) | Ctrl-miR vs. AF-miR                                | 0.0021               |                      |         |        |
|         | AF-miR                                  | 20                                                                  |                                                                                   |                                                                     | 56.5 $\pm$ 4.429                            | Ctrl-miR vs. AF(res) | >0.999                                             |                                                                                                             |                        |                   |                                                    |                                                    |                      |                      |         |        |
|         | AF(res)                                 | 20                                                                  |                                                                                   |                                                                     | 75 $\pm$ 3.663                              |                      |                                                    |                                                                                                             |                        |                   |                                                    |                                                    |                      |                      |         |        |
|         | e2                                      | Cultured neuron transfected with Ctrl-miR, AF-miR, AF(res)_DIV 12+6 | Intensity of PSD95/protrusion                                                     | Ctrl-miR                                                            | 400                                         | 79.17 $\pm$ 2.91     | One way ANOVA                                      | Multiple Comparison Procedures (Bonferroni t-test)                                                          | Ctrl-miR vs. AF-miR    | <0.0001           |                                                    |                                                    |                      |                      |         |        |
|         |                                         |                                                                     |                                                                                   | AF-miR                                                              | 400                                         | 45.77 $\pm$ 1.949    |                                                    |                                                                                                             | Ctrl-miR vs. AF(res)   | 0.3912            |                                                    |                                                    |                      |                      |         |        |
|         |                                         |                                                                     |                                                                                   | AF(res)                                                             | 400                                         | 73.72 $\pm$ 2.68     |                                                    |                                                                                                             |                        |                   |                                                    |                                                    |                      |                      |         |        |
|         | h1                                      | Percentage (%) of SVP38+ protrusion/D endrite                       | Ctrl-miR                                                                          | 20                                                                  | 90 $\pm$ 2.46                               | One way ANOVA        | Multiple Comparison Procedures (Bonferroni t-test) | Ctrl-miR vs. AF-miR                                                                                         | <0.0001                |                   |                                                    |                                                    |                      |                      |         |        |
|         |                                         |                                                                     | AF-miR                                                                            | 20                                                                  | 75.25 $\pm$ 2.844                           |                      |                                                    | Ctrl-miR vs. AF(res)                                                                                        | >0.999                 |                   |                                                    |                                                    |                      |                      |         |        |
|         |                                         |                                                                     | AF(res)                                                                           | 20                                                                  | 88.75 $\pm$ 1.196                           |                      |                                                    |                                                                                                             |                        |                   |                                                    |                                                    |                      |                      |         |        |
|         | h2                                      | Intensity of SVP38/protrusion                                       | Ctrl-miR                                                                          | 400                                                                 | 109.6 $\pm$ 3.204                           | One way ANOVA        | Multiple Comparison Procedures (Bonferroni t-test) | Ctrl-miR vs. AF-miR                                                                                         | <0.0001                |                   |                                                    |                                                    |                      |                      |         |        |
| AF-miR  |                                         |                                                                     | 400                                                                               | 78.68 $\pm$ 3.098                                                   | Ctrl-miR vs. AF(res)                        |                      |                                                    | >0.999                                                                                                      |                        |                   |                                                    |                                                    |                      |                      |         |        |

|           |                 |                                                                          |                                                    |                 |              |                                            |                                                                                                                        |                                                                                                                                                  |              |               |
|-----------|-----------------|--------------------------------------------------------------------------|----------------------------------------------------|-----------------|--------------|--------------------------------------------|------------------------------------------------------------------------------------------------------------------------|--------------------------------------------------------------------------------------------------------------------------------------------------|--------------|---------------|
|           |                 |                                                                          | AF(res)                                            | 400             | 111.4±3.261  |                                            |                                                                                                                        |                                                                                                                                                  |              |               |
| 4         | b               | No. of protrusions / 20um                                                | Ctrl-miR                                           | 60              | 16.25±0.5249 | One way ANOVA<br>F(2,177)=0.06293, P=0.939 | Multiple Comparison Procedures (Bonferroni t-test)<br>Ctrl-miR vs. AFmiR >0.999<br>Ctrl-miR vs. AF(res) >0.999         |                                                                                                                                                  |              |               |
|           |                 |                                                                          | AF-miR                                             | 60              | 16.52±0.492  |                                            |                                                                                                                        |                                                                                                                                                  |              |               |
|           |                 |                                                                          | AF(res)                                            | 60              | 16.28±0.6991 |                                            |                                                                                                                        |                                                                                                                                                  |              |               |
|           | c1              | Cultured neuron transfected with Ctrl-miR, AF-miR, AF(res)_DIV 22+6      | Cumulative (%) in spine width                      | Ctrl-miR        | 975          |                                            | Statistical Test<br>KS-test                                                                                            | Ctrl-miR vs. AFmiR <0.0001<br>Ctrl-miR vs. AF(res) 0.056                                                                                         | P value      | D<br>0.3498   |
|           |                 |                                                                          |                                                    | AF-miR          | 991          |                                            |                                                                                                                        |                                                                                                                                                  |              |               |
|           |                 |                                                                          |                                                    | AF(res)         | 976          |                                            |                                                                                                                        |                                                                                                                                                  |              |               |
|           | c2              | Cultured neuron transfected with Ctrl-miR, AF-miR, AF(res)_DIV 22+6      | Cumulative (%) in spine length                     | Ctrl-miR        | 975          |                                            | Statistical Test<br>KS-test                                                                                            | Ctrl-miR vs. AFmiR 0.062<br>Ctrl-miR vs. AF(res) 0.056                                                                                           | P value      | D<br>0.0591   |
|           |                 |                                                                          |                                                    | AF-miR          | 991          |                                            |                                                                                                                        |                                                                                                                                                  |              |               |
|           |                 |                                                                          |                                                    | AF(res)         | 976          |                                            |                                                                                                                        |                                                                                                                                                  |              |               |
|           | f               | Intensity of F-actin/protrusion                                          |                                                    | Ctrl-miR        | 200          | 127.2±3.589                                | One way ANOVA<br>F(2,597)=105.5, P<0.0001                                                                              | Multiple Comparison Procedures (Bonferroni t-test)<br>Ctrl-miR vs. AFmiR <0.0001<br>Ctrl-miR vs. AF(res) 0.101                                   |              |               |
|           |                 |                                                                          |                                                    | AF-miR          | 200          | 61.6±2.922                                 |                                                                                                                        |                                                                                                                                                  |              |               |
|           |                 |                                                                          |                                                    | AF(res)         | 200          | 116.9±3.737                                |                                                                                                                        |                                                                                                                                                  |              |               |
| 5         | e               | No. of protrusions / 20um                                                | klh17 +/+                                          | 30              | 16.17±0.7537 | One way ANOVA<br>F(2,87)=0.4062, P=0.6674  | Multiple Comparison Procedures (Bonferroni t-test)<br>klh17 +/+ vs. klh17 +/- >0.999<br>klh17 +/- vs. klh17 -/- >0.999 |                                                                                                                                                  |              |               |
|           |                 |                                                                          | klh17 +/-                                          | 30              | 15.27±0.767  |                                            |                                                                                                                        |                                                                                                                                                  |              |               |
|           |                 |                                                                          | klh17 -/-                                          | 30              | 15.97±0.7022 |                                            |                                                                                                                        |                                                                                                                                                  |              |               |
|           | f1              | Cultured neuron with different genotype_D IV 12+6                        | Cumulative (%) in spine width                      | klh17 +/+       | 485          |                                            | Statistical Test<br>KS-test                                                                                            | klh17 +/+ vs. klh17 +/- <0.0001<br>klh17 +/- vs. klh17 -/- <0.0001                                                                               | P value      | D<br>0.2475   |
|           |                 |                                                                          |                                                    | klh17 +/-       | 458          |                                            |                                                                                                                        |                                                                                                                                                  |              |               |
|           |                 |                                                                          |                                                    | klh17 -/-       | 479          |                                            |                                                                                                                        |                                                                                                                                                  |              |               |
|           | f2              | Cultured neuron with different genotype_D IV 12+6                        | Cumulative (%) in spine length                     | klh17 +/+       | 485          |                                            | Statistical Test<br>KS-test                                                                                            | klh17 +/+ vs. klh17 +/- 0.098<br>klh17 +/- vs. klh17 -/- 0.333                                                                                   | P value      | D<br>0.0794   |
|           |                 |                                                                          |                                                    | klh17 +/-       | 458          |                                            |                                                                                                                        |                                                                                                                                                  |              |               |
|           |                 |                                                                          |                                                    | klh17 -/-       | 479          |                                            |                                                                                                                        |                                                                                                                                                  |              |               |
|           | h               | Cultured neuron with different genotype_D IV 18                          | Overlap coefficient                                | klh17 +/+       | 60           | 1.2354±0.00700                             | Unpaired T test                                                                                                        | p<0.0001                                                                                                                                         | t(118)=12.27 | Two-tail      |
|           |                 |                                                                          |                                                    | klh17 +/-       | 60           | 1.1301±0.00495                             |                                                                                                                        |                                                                                                                                                  |              |               |
|           | 6               | b1                                                                       | Cultured neuron with different genotype_D IV 18-19 | mEPSC frequency | klh17 +/+    | 12                                         | 4.157±0.9095                                                                                                           | Unpaired T test                                                                                                                                  | 0.9852       | t(23)=0.01874 |
| klh17 +/- |                 |                                                                          |                                                    |                 | 13           | 4.133±0.9053                               |                                                                                                                        |                                                                                                                                                  |              |               |
| b2        |                 | Cultured neuron with different genotype_D IV 18-19                       | mEPSC amplitude                                    | klh17 +/+       | 12           | 12.59±0.8143                               | Unpaired T test                                                                                                        | 0.0315                                                                                                                                           | t(23)=2.29   | Two-tail      |
|           |                 |                                                                          |                                                    | klh17 +/-       | 13           | 15.15±0.7697                               |                                                                                                                        |                                                                                                                                                  |              |               |
| c1        |                 | Open field                                                               | Moving distance                                    | klh17 +/+       | 10           | 3566±145.3                                 | Unpaired T test                                                                                                        | 0.0186                                                                                                                                           | t(18)=2.587  | Two-tail      |
|           |                 |                                                                          |                                                    | klh17 +/-       | 10           | 4369±274.5                                 |                                                                                                                        |                                                                                                                                                  |              |               |
| c2        |                 | Open field                                                               | Rearing                                            | klh17 +/+       | 10           | 51.6±4.41                                  | Unpaired T test                                                                                                        | 0.0053                                                                                                                                           | t(18)=3.173  | Two-tail      |
|           |                 |                                                                          |                                                    | klh17 +/-       | 10           | 72.3±4.808                                 |                                                                                                                        |                                                                                                                                                  |              |               |
| d         |                 | Elevated plus maze                                                       | Open arm                                           | klh17 +/+       | 10           | 19.22±1.624                                | Unpaired T test                                                                                                        | 0.2953                                                                                                                                           | t(18)=1.078  | Two-tail      |
|           |                 |                                                                          |                                                    | klh17 +/-       | 10           | 23.73±3.864                                |                                                                                                                        |                                                                                                                                                  |              |               |
| e         |                 | Reciprocal social interaction                                            | Interaction time                                   | klh17 +/+       | 10           | 148.5±13.48                                | Unpaired T test                                                                                                        | 0.0164                                                                                                                                           | t(18)=2.645  | Two-tail      |
|           |                 |                                                                          |                                                    | klh17 +/-       | 10           | 104.8±9.574                                |                                                                                                                        |                                                                                                                                                  |              |               |
| 7         | d               | AF, AF-N, AF-C expressed COS1                                            | AF                                                 | 50              | 1±0.08289    | One way ANOVA<br>F(2,147)=8.122, P=0.0005  | Multiple Comparison Procedures (Bonferroni t-test)<br>AF vs. AF-N 0.0003<br>AF vs. AF-C 0.1368                         |                                                                                                                                                  |              |               |
|           |                 |                                                                          | AF-N                                               | 50              | 1.684±0.1447 |                                            |                                                                                                                        |                                                                                                                                                  |              |               |
|           |                 |                                                                          | AF-C                                               | 50              | 1.342±0.1242 |                                            |                                                                                                                        |                                                                                                                                                  |              |               |
|           | e               | AF, AF-N, AF-C expressed COS1 with LatA treatment_F-actin reorganization | Cell area (LatA+ Recovery)                         | Ctrl            | 60           | 1404±72.79                                 | One way ANOVA<br>F(3,236)=13.27, P<0.001                                                                               | Multiple Comparison Procedures (Bonferroni t-test)<br>Ctrl vs. AF-N <0.0001<br>Ctrl vs. AF-C 0.0001<br>AF vs. AF-N <0.0001<br>AF vs. AF-C 0.0001 |              |               |
|           |                 |                                                                          |                                                    | AF              | 60           | 1363±59.18                                 |                                                                                                                        |                                                                                                                                                  |              |               |
|           |                 |                                                                          |                                                    | AF-N            | 60           | 1003±40.36                                 |                                                                                                                        |                                                                                                                                                  |              |               |
|           |                 |                                                                          | AF-C                                               | 60              | 1056±49.15   |                                            |                                                                                                                        |                                                                                                                                                  |              |               |
| b         | Cultured neuron | Expression level of AF variants                                          | AF                                                 | 30              | 1±0.09282    | One way ANOVA<br>F(2,87)=28.82, P<0.0001   | Multiple Comparison Procedures (Bonferroni t-test)<br>AF vs. AF-N <0.0001<br>AF vs. AF-C 0.0024                        |                                                                                                                                                  |              |               |
|           |                 |                                                                          | AF-N                                               | 30              | 2.567±0.9621 |                                            |                                                                                                                        |                                                                                                                                                  |              |               |
|           |                 |                                                                          | AF-C                                               | 30              | 1.719±0.1568 |                                            |                                                                                                                        |                                                                                                                                                  |              |               |

| 8  |                                                          | transfected with AF, AF-N, AF-C_DIV 12+6 |                  |              |                           | One way ANOVA |                                       |         | Multiple Comparison Procedures (Bonferroni t-test) |         |                                       |                                       |         |        |
|----|----------------------------------------------------------|------------------------------------------|------------------|--------------|---------------------------|---------------|---------------------------------------|---------|----------------------------------------------------|---------|---------------------------------------|---------------------------------------|---------|--------|
| f  | Intensity of F-actin/protrusion                          | Ctrl                                     | 200              | 125.5±3.608  | F(3,796)=16.52, P<0.0001  |               |                                       |         | Ctrl vs. AF                                        | >0.999  |                                       |                                       |         |        |
|    |                                                          | AF                                       | 200              | 131.7±3.791  |                           |               |                                       |         | Ctrl vs. AF-N                                      | 0.0056  |                                       |                                       |         |        |
|    |                                                          | AF-N                                     | 200              | 107.5±3.943  |                           |               |                                       |         | Ctrl vs. AF-C                                      | <0.0001 |                                       |                                       |         |        |
|    |                                                          | AF-C                                     | 200              | 98.06±3.992  |                           |               |                                       |         |                                                    |         |                                       |                                       |         |        |
| 9  |                                                          | No. of protrusions / 20um                |                  |              |                           | One way ANOVA |                                       |         | Multiple Comparison Procedures (Bonferroni t-test) |         |                                       |                                       |         |        |
| b  |                                                          | Ctrl                                     | 60               | 11.05±0.463  | F(3,236)=0.2354, P=0.8716 |               |                                       |         | Ctrl vs. AF                                        | >0.999  |                                       |                                       |         |        |
|    |                                                          | AF                                       | 60               | 10.95±0.5242 |                           |               |                                       |         | Ctrl vs. AF-N                                      | >0.999  |                                       |                                       |         |        |
|    |                                                          | AF-N                                     | 60               | 10.52±0.4618 |                           |               |                                       |         | Ctrl vs. AF-C                                      | >0.999  |                                       |                                       |         |        |
|    |                                                          | AF-C                                     | 60               | 10.75±0.4915 |                           |               |                                       |         |                                                    |         |                                       |                                       |         |        |
| c1 | Cultured neuron transfected with AF, AF-N, AF-C_DIV 12+6 | Cumulative (%) in spine width            | Ctrl             | 663          | F(4,145)=0.5755, P=0.6808 | KS-test       | Ctrl vs. AF                           | 0.055   | 0.0733                                             |         |                                       |                                       |         |        |
|    |                                                          |                                          | AF               | 655          |                           |               |                                       |         |                                                    |         |                                       | Ctrl vs. AF-N                         | <0.0001 | 0.3004 |
|    |                                                          |                                          | AF-N             | 629          |                           |               |                                       |         |                                                    |         |                                       | Ctrl vs. AF-C                         | <0.0001 | 0.3147 |
|    |                                                          |                                          | AF-C             | 644          |                           |               |                                       |         |                                                    |         |                                       |                                       |         |        |
| c2 |                                                          | Cumulative (%) in spine length           | Ctrl             | 663          | F(4,145)=0.5755, P=0.6808 | KS-test       | Ctrl vs. AF                           | 0.115   | 0.0654                                             |         |                                       |                                       |         |        |
|    |                                                          |                                          | AF               | 655          |                           |               |                                       |         |                                                    |         |                                       | Ctrl vs. AF-N                         | 0.064   | 0.0717 |
|    |                                                          |                                          | AF-N             | 629          |                           |               |                                       |         |                                                    |         |                                       | Ctrl vs. AF-C                         | 0.061   | 0.0714 |
|    |                                                          |                                          | AF-C             | 644          |                           |               |                                       |         |                                                    |         |                                       |                                       |         |        |
| e  | No. of protrusions / 20um                                | kih17 +/+ ; Ctrl                         | 30               | 15.37±0.6806 | F(4,145)=0.5755, P=0.6808 |               |                                       |         |                                                    |         |                                       |                                       |         |        |
|    |                                                          | kih17 -/- ; Ctrl                         | 30               | 16.47±0.885  |                           |               |                                       |         |                                                    |         | kih17 +/+ ; Ctrl vs. kih17 -/- ; Ctrl | >0.999                                |         |        |
|    |                                                          | kih17 -/- ; AF                           | 30               | 15.53±0.786  |                           |               |                                       |         |                                                    |         | kih17 +/+ ; Ctrl vs. kih17 -/- ; AF   | >0.999                                |         |        |
|    |                                                          | kih17 -/- ; AF-N                         | 30               | 16.9±1.069   |                           |               |                                       |         |                                                    |         | kih17 +/+ ; Ctrl vs. kih17 -/- ; AF-N | >0.999                                |         |        |
| f1 | Cultured neuron transfected with AF, AF-N, AF-C_DIV 12+6 | Cumulative (%) in spine width            | kih17 +/+ ; Ctrl | 461          | F(4,145)=0.5755, P=0.6808 | KS-test       | kih17 +/+ ; Ctrl vs. kih17 -/- ; Ctrl | <0.0001 | 0.3643                                             |         |                                       |                                       |         |        |
|    |                                                          |                                          | kih17 -/- ; Ctrl | 494          |                           |               |                                       |         |                                                    |         |                                       | kih17 +/+ ; Ctrl vs. kih17 -/- ; AF   | <0.0001 | 0.2845 |
|    |                                                          |                                          | kih17 -/- ; AF   | 466          |                           |               |                                       |         |                                                    |         |                                       | kih17 +/+ ; Ctrl vs. kih17 -/- ; AF-N | 0.985   | 0.0286 |
|    |                                                          |                                          | kih17 -/- ; AF-N | 507          |                           |               |                                       |         |                                                    |         |                                       | kih17 +/+ ; Ctrl vs. kih17 -/- ; AF-C | 0.967   | 0.0314 |
| f2 |                                                          | Cumulative (%) in spine length           | kih17 +/+ ; Ctrl | 461          | F(4,145)=0.5755, P=0.6808 | KS-test       | kih17 +/+ ; Ctrl vs. kih17 -/- ; Ctrl | 0.717   | 0.0447                                             |         |                                       |                                       |         |        |
|    |                                                          |                                          | kih17 -/- ; Ctrl | 494          |                           |               |                                       |         |                                                    |         |                                       | kih17 +/+ ; Ctrl vs. kih17 -/- ; AF   | 0.082   | 0.0798 |
|    |                                                          |                                          | kih17 -/- ; AF   | 466          |                           |               |                                       |         |                                                    |         |                                       | kih17 +/+ ; Ctrl vs. kih17 -/- ; AF-N | 0.348   | 0.0585 |
|    |                                                          |                                          | kih17 -/- ; AF-N | 507          |                           |               |                                       |         |                                                    |         |                                       | kih17 +/+ ; Ctrl vs. kih17 -/- ; AF-C | 0.628   | 0.047  |
|    |                                                          |                                          | kih17 -/- ; AF-C | 488          | F(4,145)=0.5755, P=0.6808 | KS-test       | kih17 +/+ ; Ctrl vs. kih17 -/- ; AF-C | 0.628   | 0.047                                              |         |                                       |                                       |         |        |
|    |                                                          |                                          |                  |              |                           |               |                                       |         |                                                    |         |                                       |                                       |         |        |
|    |                                                          |                                          |                  |              |                           |               |                                       |         |                                                    |         |                                       |                                       |         |        |
|    |                                                          |                                          |                  |              |                           |               |                                       |         |                                                    |         |                                       |                                       |         |        |
